# Supplementary material for: Syntheses, structural modulation, and slow magnetic relaxation of three dysprosium(iii) complexes with mononuclear, dinuclear, and one-dimensional structures
Source: Royal Society of Chemistry journal article supplement (doi:10.1039/d1dt02532e), 2021-01-01
Supplement: d1dt02532e1.pdf [file d1dt02532e1.pdf]

## Electronic Supplementary Information

### **Syntheses, structural modulation and slow magnetic relaxation of three dysprosium(III) complexes with mononuclear, dinuclear and one-dimensional structures**

Hua-Jian Ye,<sup>a</sup> Tian Zhang,<sup>a</sup> Shu-Yuan Huang,<sup>a</sup> Xiao-Ling Liu,<sup>a</sup> Wen-Bin Chen,<sup>\*a</sup> Yi-Quan zhang,<sup>\*b</sup> Jinkui Tang<sup>\*c</sup> and Wen Dong<sup>\*a</sup>

<sup>a</sup>Guangzhou Key Laboratory for Environmentally Functional Materials and Technology, School of Chemistry and Chemical Engineering, Guangzhou University, Guangzhou 510006, P. R. China

<sup>b</sup>Jiangsu Key Laboratory for NSLSCS, School of Physical Science and Technology, Nanjing Normal University, Nanjing 210023, P. R. China

<sup>c</sup>State Key Laboratory of Rare Earth Resource Utilization, Changchun Institute of Applied Chemistry, Chinese Academy of Sciences, Changchun 130022, P. R. China

## Contents of the Electronic Supplementary Information

|                                                                                                                                                                                                                                                                                                                                 |    |
|---------------------------------------------------------------------------------------------------------------------------------------------------------------------------------------------------------------------------------------------------------------------------------------------------------------------------------|----|
| <b>Scheme S1.</b> Syntheses of H <sub>4</sub> ATB. ....                                                                                                                                                                                                                                                                         | 3  |
| <b>Table S1.</b> Continuous Shape Measures calculations (CShM) for <b>1-3</b> . ....                                                                                                                                                                                                                                            | 3  |
| <b>Figure S1.</b> Hydrogen Bonds, 3D Supramolecular structure and ORTEP view of <b>1</b> . ....                                                                                                                                                                                                                                 | 4  |
| <b>Figure S2.</b> Hydrogen Bonds, $\pi$ - $\pi$ Stacking interaction, 3D Supramolecular structure and ORTEP view of <b>2</b> . ....                                                                                                                                                                                             | 5  |
| <b>Figure S3.</b> Hydrogen Bonds, 3D Supramolecular structure and ORTEP view of <b>3</b> . ....                                                                                                                                                                                                                                 | 6  |
| <b>Figure S4.</b> Powder X-ray diffraction (PXRD) patterns for H <sub>4</sub> ATB and complexes <b>1-3</b> . ....                                                                                                                                                                                                               | 7  |
| <b>Figure S5.</b> Thermal gravimetric Analyses (TGA) curves for complexes <b>1-3</b> . ....                                                                                                                                                                                                                                     | 7  |
| <b>Table S2.</b> Crystal data and structure refinement for H <sub>4</sub> ATB and complexes <b>1-3</b> at 100 K. ....                                                                                                                                                                                                           | 8  |
| <b>Table S3.</b> The bond lengths [ $\text{\AA}$ ] and angles [ $^\circ$ ] for complex <b>1</b> . ....                                                                                                                                                                                                                          | 9  |
| <b>Table S4.</b> The bond lengths [ $\text{\AA}$ ] and angles [ $^\circ$ ] for complex <b>2</b> . ....                                                                                                                                                                                                                          | 10 |
| <b>Table S5.</b> The bond lengths [ $\text{\AA}$ ] and angles [ $^\circ$ ] for complex <b>3</b> . ....                                                                                                                                                                                                                          | 11 |
| <b>Figure S6.</b> The isothermal M vs. H plots for <b>1-3</b> . ....                                                                                                                                                                                                                                                            | 12 |
| <b>Figure S7.</b> Temperature dependence of the in-phase $\chi_M'$ product and out-of-phase $\chi_M''$ for <b>1</b> in a zero dc field. ....                                                                                                                                                                                    | 12 |
| <b>Figure S8.</b> Ac susceptibilities of <b>1</b> were measured at 1.9 K under different fields to find an optimum dc field for suppressing the QTM. ....                                                                                                                                                                       | 12 |
| <b>Table S6</b> Relaxation fitting parameters from Least-Squares Fitting of $\chi(\omega)$ data for <b>1</b> under 600 Oe dc field. ....                                                                                                                                                                                        | 13 |
| <b>Table S7</b> Relaxation fitting parameters from Least-Squares Fitting of $\chi(\omega)$ data for <b>2</b> under 0 Oe dc field. ....                                                                                                                                                                                          | 13 |
| <b>Table S8</b> Relaxation fitting parameters from Least-Squares Fitting of $\chi(\omega)$ data for <b>3</b> under 0 Oe dc field. ....                                                                                                                                                                                          | 14 |
| <b>Computational details</b> ....                                                                                                                                                                                                                                                                                               | 14 |
| <b>Figure S9.</b> Calculated model structures of <b>1 - 3</b> . ....                                                                                                                                                                                                                                                            | 15 |
| <b>Table S9.</b> Calculated energy levels ( $\text{cm}^{-1}$ ), $\mathbf{g}$ ( $g_x, g_y, g_z$ ) tensors and predominant $m_j$ values of the lowest eight Kramers doublets (KDs) of complex <b>1</b> and individual Dy <sup>III</sup> fragments for complexes <b>2</b> and <b>3</b> using CASSCF/RASSI-SO with MOLCAS 8.4. .... | 16 |
| <b>Table S10.</b> Wave functions with definite projection of the total moment $ m_j\rangle$ for the lowest eight KDs of complex <b>1</b> and individual Dy <sup>III</sup> fragments for complexes <b>2</b> and <b>3</b> using CASSCF/RASSI-SO with MOLCAS 8.4. ....                                                             | 17 |
| <b>Table S11.</b> Exchange energies $E$ ( $\text{cm}^{-1}$ ), the energy difference between each exchange doublets $\Delta_i$ ( $\text{cm}^{-1}$ ) and the main values of the $g_z$ for the lowest two exchange doublets of <b>2</b> and <b>3</b> . ....                                                                        | 18 |
| <b>REFERENCES</b> . ....                                                                                                                                                                                                                                                                                                        | 29 |

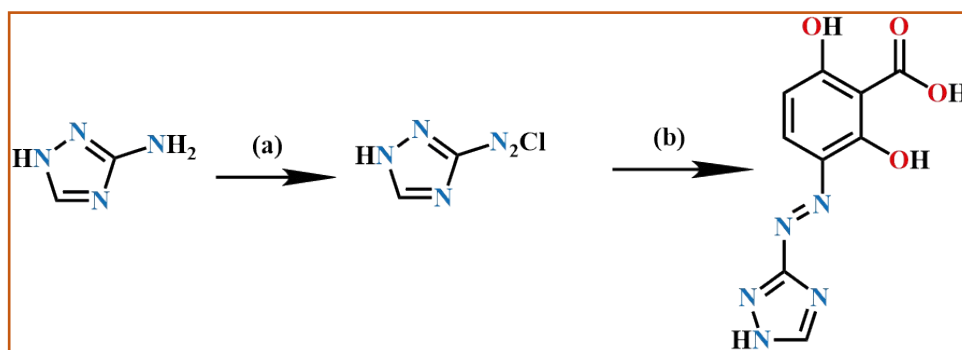

Scheme S1 Syntheses of H<sub>4</sub>ATB: (a) HCl, 0–5 °C, NaNO<sub>2</sub>, stirring; (b) 2,6-dihydroxybenzoic acid, stirring at room temperature.

Table S1. **1-3** geometry analysis by using SHAPE 2.0 program.\*

|          | CSAPR-9<br>(C <sub>4v</sub> ) | TCTPR-9<br>(D <sub>3h</sub> ) | JCSAPR-9<br>(C <sub>4v</sub> ) | JTCTPR-9<br>(D <sub>3h</sub> ) | MFF-9<br>(C <sub>s</sub> ) |
|----------|-------------------------------|-------------------------------|--------------------------------|--------------------------------|----------------------------|
| <b>1</b> | 2.12956                       | 2.30852                       | 2.81009                        | <b>1.95785</b>                 | 2.40949                    |
| <b>2</b> | <b>0.26965</b>                | 1.33393                       | 0.83299                        | 2.69822                        | 0.88793                    |
| <b>3</b> | <b>0.31048</b>                | 1.30690                       | 0.78641                        | 2.40376                        | 0.97232                    |

\*CSAPR-9=Spherical capped square antiprism;  
TCTPR-9=Spherical tricapped trigonal prism;  
JCSAPR-9=Capped square antiprism J10;  
JTCTPR-9=Tricapped trigonal prism J51;  
MFF-9=Muffin

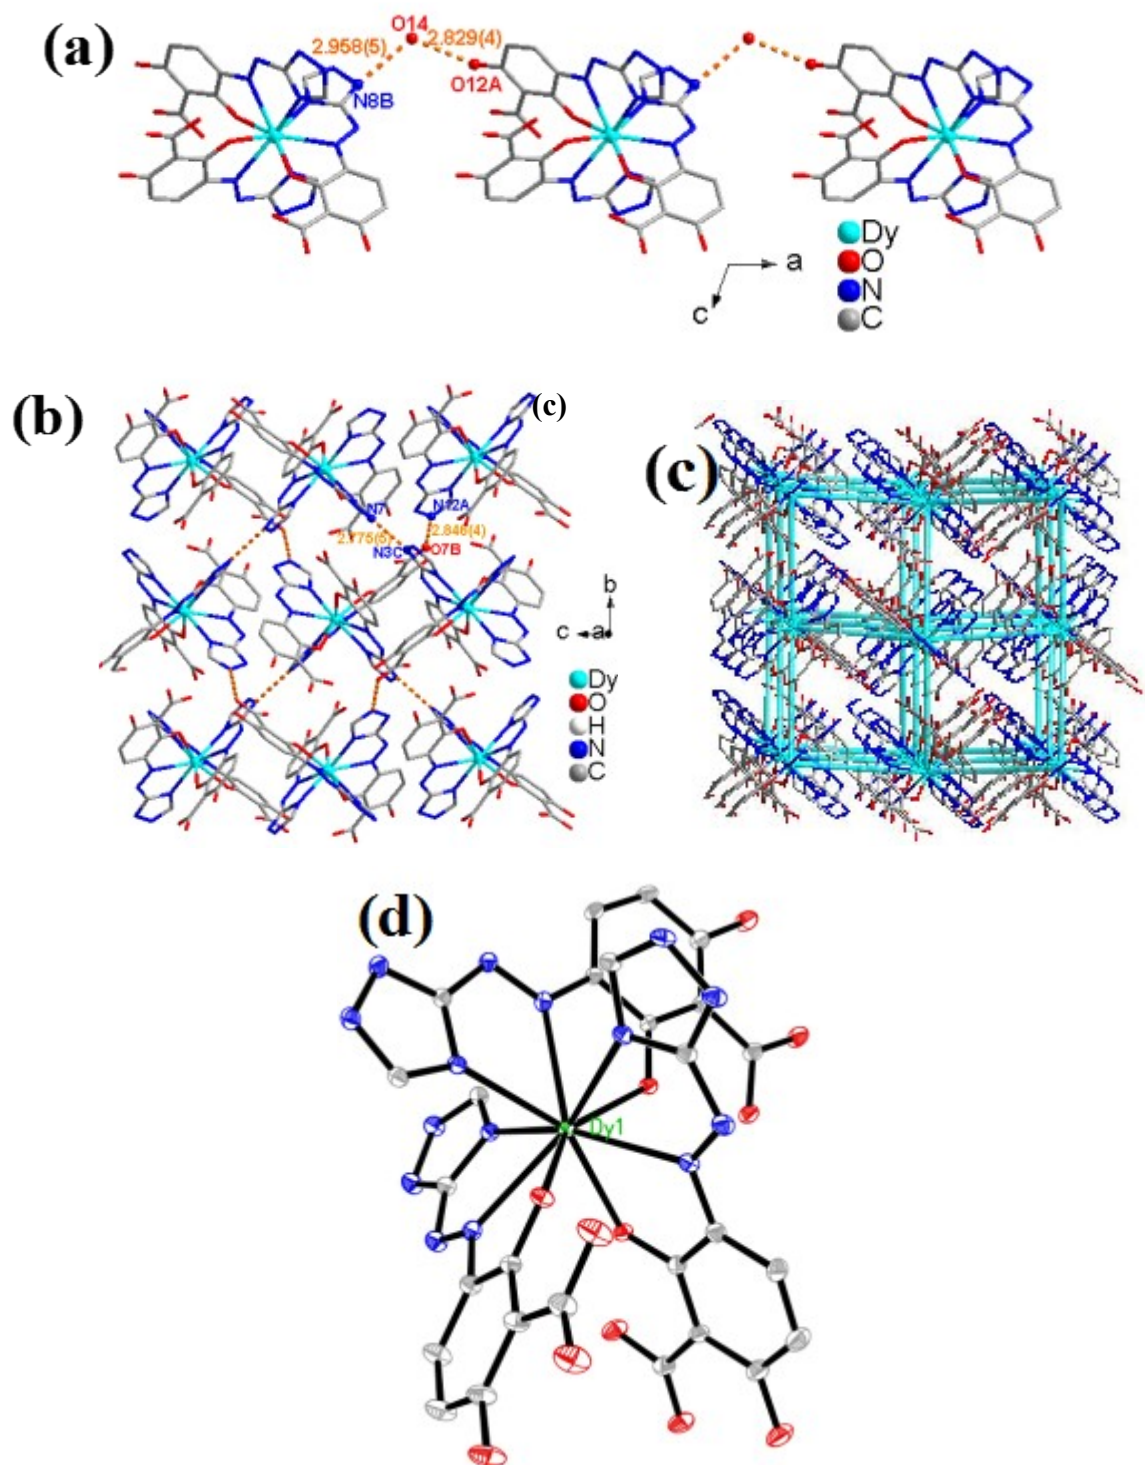

Fig. S1 For 1, (a)hydrogen bonds along the *b* axis, (b) hydrogen bonds along the *b* axis and *c* axis, (c) 3D supramolecular structure (the blue lines between the dysprosium are just for observation, without any interaction), (d) ORTEP view (30% thermal ellipsoids).

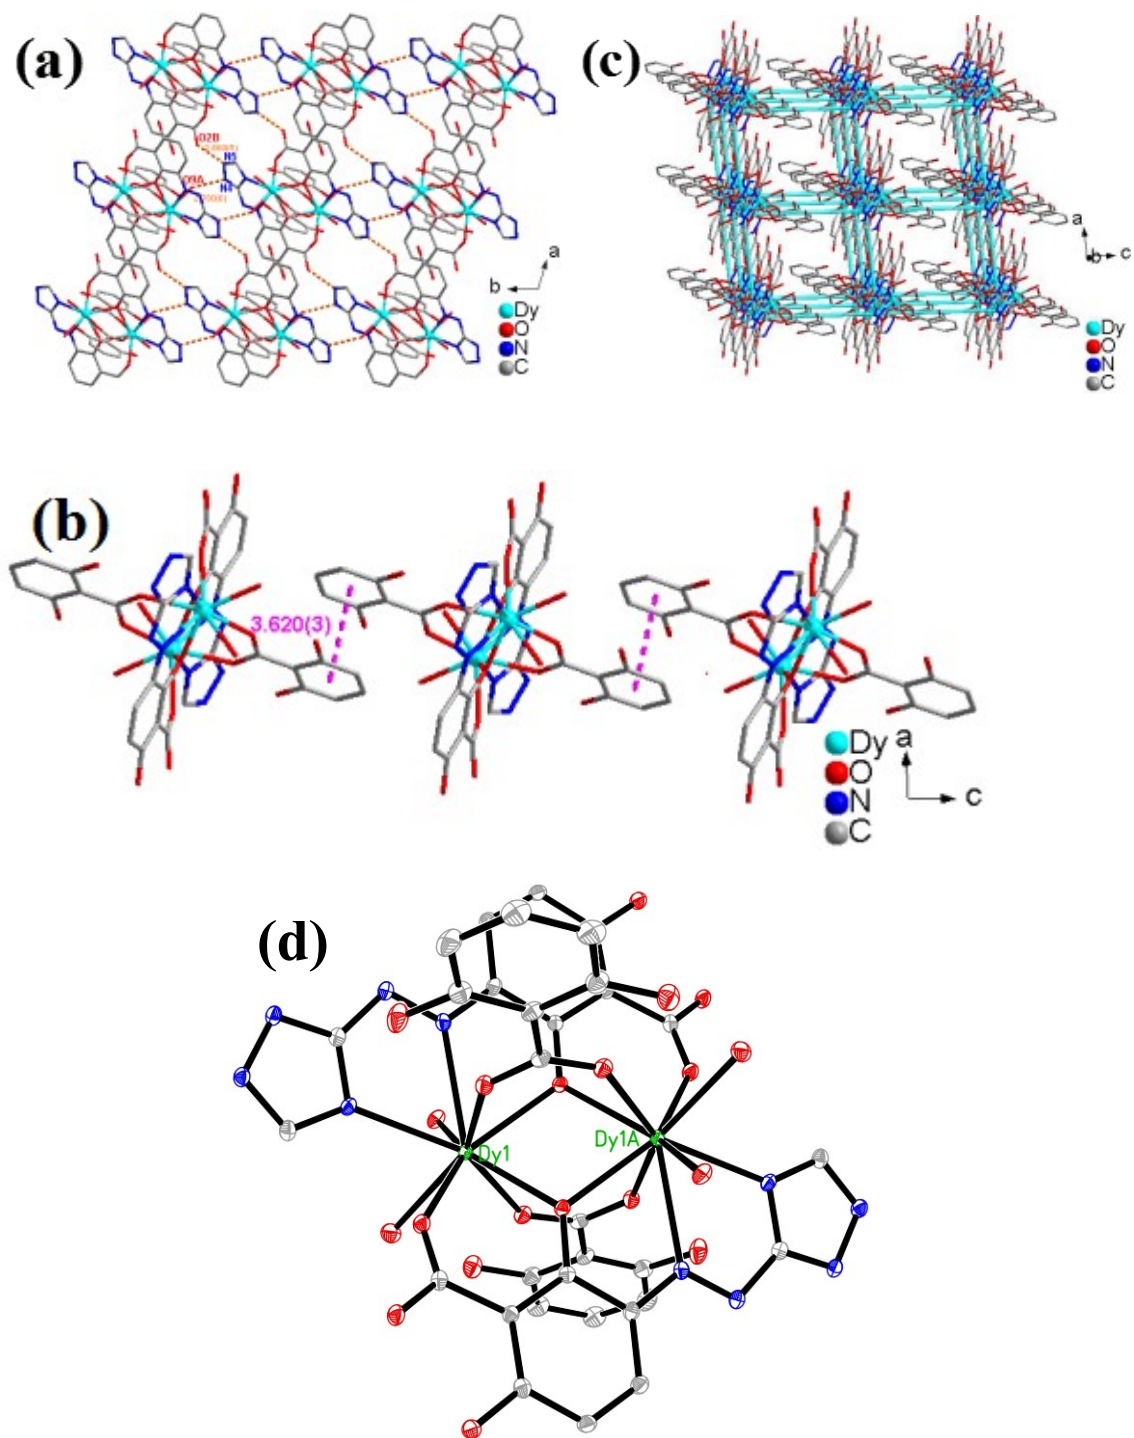

Fig. S2 For **2**, (a) hydrogen bonds along the *a* axis and *b* axis, (b) the  $\pi$ - $\pi$  stacking interaction along the *c*-axis, (c) 3D supramolecular structure (the blue lines between the dysprosium are just for observation, without any interaction), (d) ORTEP view (30% thermal ellipsoids).

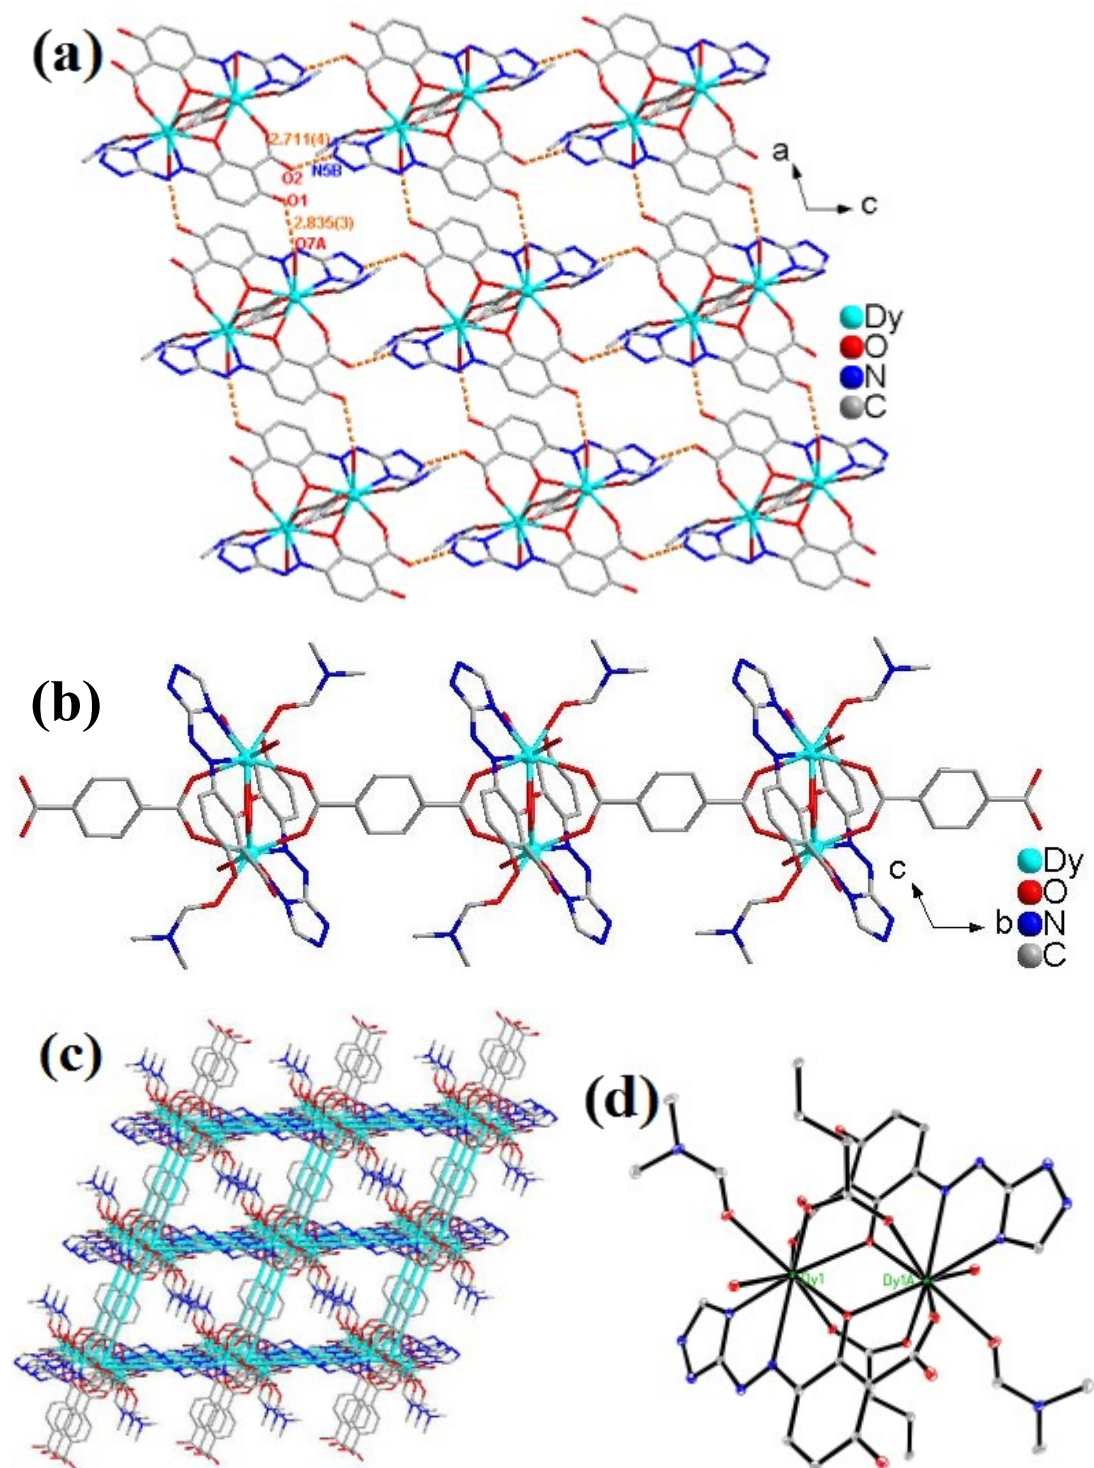

Fig. S3 For **3**, (a) hydrogen bonds along the *a* axis and *c* axis, (b) One-dimensional structure along the *b* axis, (c) 3D supramolecular structure (the blue lines between the dysprosium are just for observation, without any interaction), (d) ORTEP view (30% thermal ellipsoids).

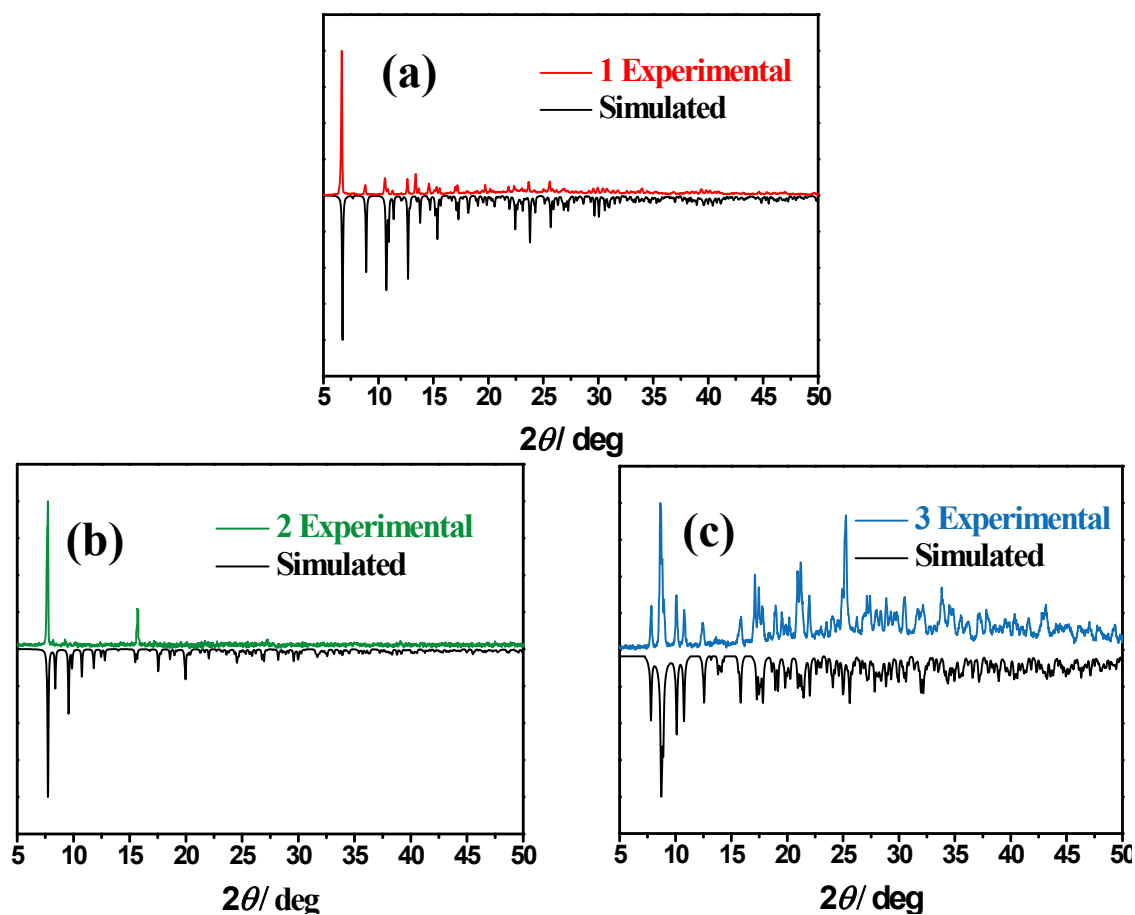

Fig. S4 Powder X-ray diffraction (PXRD) patterns for complexes 1-3

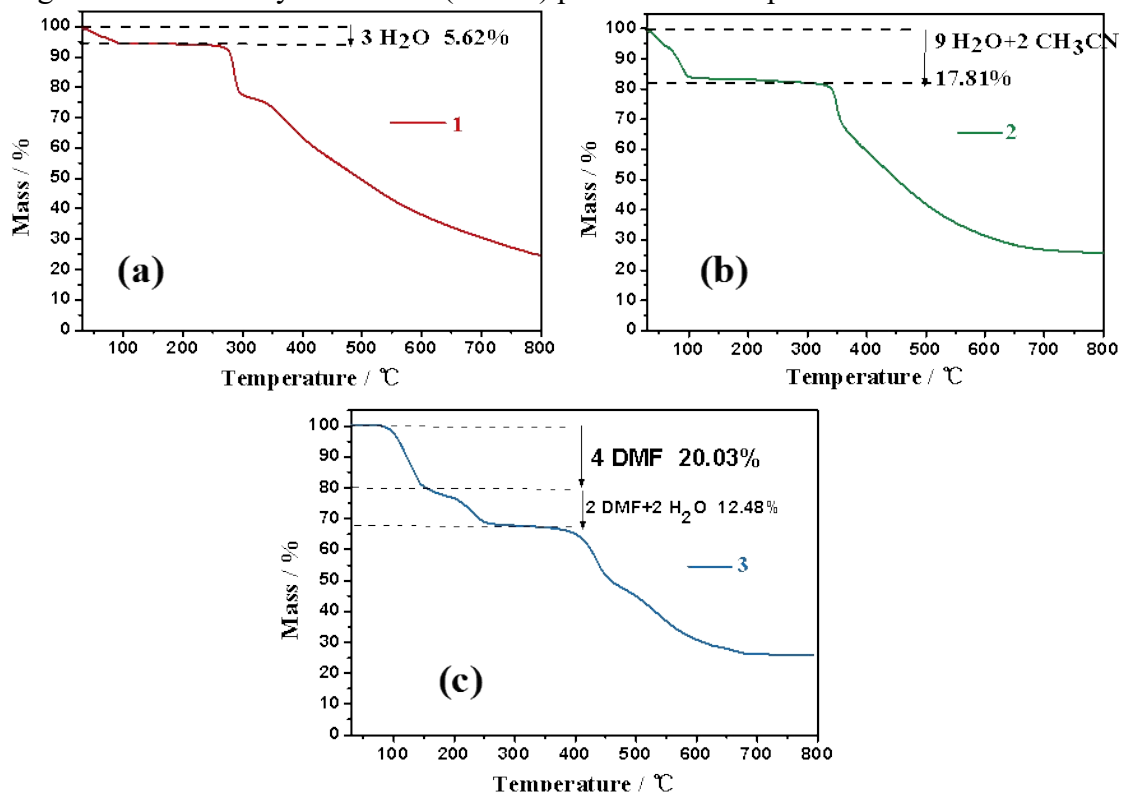

Fig. S5 TG curves of complexes 1-3.

Table S2 Crystal data and structure refinement complexes **1-3**.

|                                                             | <b>1</b>                                                          | <b>2</b>                                                                        | <b>3</b>                                                         |
|-------------------------------------------------------------|-------------------------------------------------------------------|---------------------------------------------------------------------------------|------------------------------------------------------------------|
| Empirical formula                                           | C <sub>27</sub> H <sub>24</sub> DyN <sub>15</sub> O <sub>15</sub> | C <sub>36</sub> H <sub>44</sub> Dy <sub>2</sub> N <sub>12</sub> O <sub>25</sub> | C <sub>22</sub> H <sub>30</sub> DyN <sub>8</sub> O <sub>10</sub> |
| Formula weight                                              | 961.11                                                            | 1369.83                                                                         | 729.04                                                           |
| Crystal system                                              | monoclinic                                                        | triclinic                                                                       | triclinic                                                        |
| Space group                                                 | <i>P</i> 2 <sub>1</sub> / <i>c</i>                                | <i>P</i> $\bar{1}$                                                              | <i>P</i> $\bar{1}$                                               |
| <i>a</i> /Å                                                 | 13.96209(10)                                                      | 9.6507(3)                                                                       | 10.56300(10)                                                     |
| <i>b</i> /Å                                                 | 16.44139(8)                                                       | 11.3380(2)                                                                      | 11.32340(10)                                                     |
| <i>c</i> /Å                                                 | 17.20872(11)                                                      | 11.8034(4)                                                                      | 12.71470(10)                                                     |
| $\alpha$ /°                                                 | 90                                                                | 103.705(2)                                                                      | 112.6490(10)                                                     |
| $\beta$ /°                                                  | 110.0249(7)                                                       | 90.636(2)                                                                       | 100.3860(10)                                                     |
| $\gamma$ /°                                                 | 90                                                                | 106.159(2)                                                                      | 98.7410(10)                                                      |
| Volume/Å <sup>3</sup>                                       | 3711.54(4)                                                        | 1201.07(6)                                                                      | 1338.83(2)                                                       |
| <i>Z</i>                                                    | 4                                                                 | 1                                                                               | 2                                                                |
| $\rho_{\text{calc}}$ /cm <sup>3</sup>                       | 1.720                                                             | 1.894                                                                           | 1.808                                                            |
| $\mu$ /mm <sup>-1</sup>                                     | 11.564                                                            | 17.346                                                                          | 15.554                                                           |
| F(000)                                                      | 1908.0                                                            | 676.0                                                                           | 728.0                                                            |
| Reflections collected                                       | 50442                                                             | 14773                                                                           | 17175                                                            |
| Independent reflections                                     | 7632                                                              | 4814                                                                            | 5387                                                             |
| R(int)                                                      | 0.0355                                                            | 0.0604                                                                          | 0.0413                                                           |
| Goodness-of-fit on F <sup>2</sup>                           | 1.100                                                             | 1.077                                                                           | 1.101                                                            |
| Final R indexes [ <i>I</i> ≥ 2σ( <i>I</i> )] <sup>a,b</sup> | R <sub>1</sub> = 0.0308,<br>wR <sub>2</sub> = 0.0787              | R <sub>1</sub> = 0.0419,<br>wR <sub>2</sub> = 0.1138                            | R <sub>1</sub> = 0.0288,<br>wR <sub>2</sub> = 0.0769             |
| R indexes [all data]                                        | R <sub>1</sub> = 0.0322,<br>wR <sub>2</sub> = 0.0795              | R <sub>1</sub> = 0.0438,<br>wR <sub>2</sub> = 0.1150                            | R <sub>1</sub> = 0.0295,<br>wR <sub>2</sub> = 0.0774             |
| Largest diff. peak/hole / e Å <sup>-3</sup>                 | 0.95/-1.04                                                        | 2.65/-1.28                                                                      | 1.13/-1.26                                                       |
| CCDC                                                        | 2098134                                                           | 2098135                                                                         | 2098136                                                          |

$$^a R_1 = \sum ||F_o| - |F_c|| / \sum |F_o|, \quad ^b wR_2 = [\sum w(F_o^2 - F_c^2)^2 / \sum w(F_o^2)]^{1/2}$$



Table S3 The bond lengths [ $\text{\AA}$ ] and angles [ $^\circ$ ] for complex 1.

| Atom        | Atom        | [ $\text{\AA}$ ] |                              | Atom | Atom | Atom | [ $^\circ$ ] |
|-------------|-------------|------------------|------------------------------|------|------|------|--------------|
| Dy1         | O1          | 2.3375(19)       |                              | O1   | Dy1  | O9   | 85.51(7)     |
| Dy1         | O5          | 2.3049(19)       |                              | O1   | Dy1  | N1   | 125.25(7)    |
| Dy1         | O9          | 2.3413(19)       |                              | O1   | Dy1  | N5   | 64.82(7)     |
| Dy1         | N1          | 2.484(2)         |                              | O1   | Dy1  | N6   | 150.76(7)    |
| Dy1         | N5          | 2.586(2)         |                              | O1   | Dy1  | N10  | 138.50(7)    |
| Dy1         | N6          | 2.436(2)         |                              | O1   | Dy1  | N11  | 89.77(7)     |
| Dy1         | N10         | 2.589(2)         |                              | O1   | Dy1  | N15  | 70.99(7)     |
| Dy1         | N11         | 2.507(2)         |                              | O5   | Dy1  | O1   | 77.84(7)     |
| Dy1         | N15         | 2.585(3)         |                              | O5   | Dy1  | O9   | 147.69(7)    |
| <b>Atom</b> | <b>Atom</b> | <b>Atom</b>      | <b>[<math>^\circ</math>]</b> | O5   | Dy1  | N1   | 83.29(7)     |
| N1          | Dy1         | N11              | 138.79(8)                    | O5   | Dy1  | N5   | 79.59(7)     |
| N1          | Dy1         | N15              | 144.21(8)                    | O5   | Dy1  | N6   | 126.67(7)    |
| N5          | Dy1         | N10              | 121.25(7)                    | O5   | Dy1  | N10  | 64.70(7)     |
| N5          | Dy1         | N15              | 77.88(8)                     | O5   | Dy1  | N11  | 84.15(7)     |
| N6          | Dy1         | N1               | 129.10(8)                    | O5   | Dy1  | N15  | 132.44(7)    |
| N6          | Dy1         | N5               | 61.98(7)                     | O9   | Dy1  | N1   | 84.09(7)     |
| N6          | Dy1         | N10              | 78.70(8)                     | O9   | Dy1  | N5   | 68.25(7)     |
| N6          | Dy1         | N11              | 79.94(8)                     | O9   | Dy1  | N6   | 79.01(7)     |
| N6          | Dy1         | N15              | 152.13(8)                    | O9   | Dy1  | N10  | 135.94(7)    |
| N11         | Dy1         | N5               | 70.02(7)                     | O9   | Dy1  | N11  | 123.66(7)    |
| N11         | Dy1         | N10              | 61.24(8)                     | O9   | Dy1  | N15  | 64.26(7)     |
| N11         | Dy1         | N15              | 115.97(8)                    | N1   | Dy1  | N5   | 61.39(8)     |
| N15         | Dy1         | N10              | 122.65(8)                    | N1   | Dy1  | N10  | 69.11(7)     |

Table S4 The bond lengths [ $\text{\AA}$ ] and angles [ $^\circ$ ] for complex 2.

| Atom            | Atom             | [ $\text{\AA}$ ] |                              | Atom            | Atom | Atom             | [ $^\circ$ ] |
|-----------------|------------------|------------------|------------------------------|-----------------|------|------------------|--------------|
| Dy1             | Dy1 <sup>1</sup> | 3.7652(4)        |                              | O3              | Dy1  | Dy1 <sup>1</sup> | 107.29(7)    |
| Dy1             | O3               | 2.300(3)         |                              | O3              | Dy1  | O4 <sup>1</sup>  | 141.57(10)   |
| Dy1             | O4 <sup>1</sup>  | 2.384(3)         |                              | O3              | Dy1  | O4               | 72.04(10)    |
| Dy1             | O4               | 2.367(3)         |                              | O3              | Dy1  | O6 <sup>1</sup>  | 110.94(10)   |
| Dy1             | O6 <sup>1</sup>  | 2.396(3)         |                              | O3              | Dy1  | O7               | 75.17(11)    |
| Dy1             | O7               | 2.394(3)         |                              | O3              | Dy1  | O9               | 138.16(10)   |
| Dy1             | O9               | 2.446(3)         |                              | O3              | Dy1  | O10              | 71.61(11)    |
| Dy1             | O10              | 2.435(3)         |                              | O3              | Dy1  | N1 <sup>1</sup>  | 125.68(11)   |
| Dy1             | N1 <sup>1</sup>  | 2.602(4)         |                              | O3              | Dy1  | N3 <sup>1</sup>  | 73.47(11)    |
| Dy1             | N3 <sup>1</sup>  | 2.484(3)         |                              | O4 <sup>1</sup> | Dy1  | Dy1 <sup>1</sup> | 37.73(7)     |
| <b>Atom</b>     | <b>Atom</b>      | <b>Atom</b>      | <b>[<math>^\circ</math>]</b> | O4              | Dy1  | Dy1 <sup>1</sup> | 37.42(7)     |
| O6 <sup>1</sup> | Dy1              | N1 <sup>1</sup>  | 123.12(11)                   | O4 <sup>1</sup> | Dy1  | O4               | 75.15(11)    |
| O6 <sup>1</sup> | Dy1              | N3 <sup>1</sup>  | 142.03(11)                   | O4              | Dy1  | O6 <sup>1</sup>  | 76.15(10)    |
| O7              | Dy1              | Dy1 <sup>1</sup> | 72.88(7)                     | O4 <sup>1</sup> | Dy1  | O6 <sup>1</sup>  | 76.15(10)    |
| O7              | Dy1              | O9               | 132.68(10)                   | O4 <sup>1</sup> | Dy1  | O7               | 77.67(10)    |
| O7              | Dy1              | O10              | 141.71(11)                   | O4              | Dy1  | O7               | 75.34(10)    |
| O7              | Dy1              | N1 <sup>1</sup>  | 66.21(11)                    | O4 <sup>1</sup> | Dy1  | O9               | 75.34(10)    |
| O7              | Dy1              | N3 <sup>1</sup>  | 75.98(11)                    | O4              | Dy1  | O9               | 110.93(10)   |
| O9              | Dy1              | Dy1 <sup>1</sup> | 110.72(7)                    | O4 <sup>1</sup> | Dy1  | O10              | 140.54(10)   |
| O9              | Dy1              | N1 <sup>1</sup>  | 66.52(10)                    | O4              | Dy1  | O10              | 128.01(10)   |
| O9              | Dy1              | N3 <sup>1</sup>  | 83.60(11)                    | O4              | Dy1  | N1 <sup>1</sup>  | 63.77(10)    |
| O10             | Dy1              | Dy1 <sup>1</sup> | 135.36(8)                    | O4 <sup>1</sup> | Dy1  | N1 <sup>1</sup>  | 63.77(10)    |
| O10             | Dy1              | O9               | 69.30(10)                    | O4              | Dy1  | N3 <sup>1</sup>  | 139.56(11)   |
| O10             | Dy1              | N1 <sup>1</sup>  | 120.99(11)                   | O4 <sup>1</sup> | Dy1  | N3 <sup>1</sup>  | 124.91(11)   |
| O10             | Dy1              | N3 <sup>1</sup>  | 76.78(11)                    | O6 <sup>1</sup> | Dy1  | Dy1 <sup>1</sup> | 69.50(7)     |
| N1 <sup>1</sup> | Dy1              | Dy1 <sup>1</sup> | 96.43(7)                     | O6 <sup>1</sup> | Dy1  | O7               | 141.97(10)   |
| N3 <sup>1</sup> | Dy1              | Dy1 <sup>1</sup> | 147.31(8)                    | O6 <sup>1</sup> | Dy1  | O9               | 68.32(10)    |
| N3 <sup>1</sup> | Dy1              | N1 <sup>1</sup>  | 61.44(11)                    | O6 <sup>1</sup> | Dy1  | O10              | 69.79(11)    |

<sup>1</sup>1-X,1-Y,1-Z

Table S5 The bond lengths [ $\text{\AA}$ ] and angles [ $^\circ$ ] for complex **3**.

| Atom            | Atom             | [ $\text{\AA}$ ]or[ $^\circ$ ] |                                                         | Atom            | Atom | Atom             | [ $\text{\AA}$ ]or[ $^\circ$ ] |
|-----------------|------------------|--------------------------------|---------------------------------------------------------|-----------------|------|------------------|--------------------------------|
| Dy1             | Dy1 <sup>1</sup> | 3.7943(3)                      |                                                         | O3 <sup>1</sup> | Dy1  | Dy1 <sup>1</sup> | 37.63(5)                       |
| Dy1             | O3 <sup>1</sup>  | 2.3938(18)                     |                                                         | O3              | Dy1  | Dy1 <sup>1</sup> | 37.59(4)                       |
| Dy1             | O3               | 2.3959(19)                     |                                                         | O3 <sup>1</sup> | Dy1  | O3               | 75.22(7)                       |
| Dy1             | O4               | 2.3480(19)                     |                                                         | O3              | Dy1  | O6               | 113.31(7)                      |
| Dy1             | O5 <sup>1</sup>  | 2.3816(18)                     |                                                         | O3 <sup>1</sup> | Dy1  | O6               | 144.39(7)                      |
| Dy1             | O6               | 2.464(2)                       |                                                         | O3 <sup>1</sup> | Dy1  | O7               | 80.92(7)                       |
| Dy1             | O1               | 2.344(2)                       |                                                         | O3              | Dy1  | O7               | 140.23(7)                      |
| Dy1             | O7               | 2.406(2)                       |                                                         | O3              | Dy1  | N1 <sup>1</sup>  | 126.64(7)                      |
| Dy1             | N1 <sup>1</sup>  | 2.596(2)                       |                                                         | O3 <sup>1</sup> | Dy1  | N1 <sup>1</sup>  | 63.99(7)                       |
| Dy1             | N3 <sup>1</sup>  | 2.513(2)                       |                                                         | O3              | Dy1  | N3 <sup>1</sup>  | 136.92(7)                      |
| <b>Atom</b>     | <b>Atom</b>      | <b>Atom</b>                    | <b>[<math>\text{\AA}</math>]or[<math>^\circ</math>]</b> | O3 <sup>1</sup> | Dy1  | N3 <sup>1</sup>  | 124.80(7)                      |
| O6              | Dy1              | N3 <sup>1</sup>                | 73.92(7)                                                | O4              | Dy1  | Dy1 <sup>1</sup> | 70.26(5)                       |
| O1              | Dy1              | Dy1 <sup>1</sup>               | 106.19(5)                                               | O4              | Dy1  | O3               | 73.41(7)                       |
| O1              | Dy1              | O3                             | 70.96(6)                                                | O4              | Dy1  | O3 <sup>1</sup>  | 75.55(6)                       |
| O1              | Dy1              | O3 <sup>1</sup>                | 140.22(7)                                               | O4              | Dy1  | O5 <sup>1</sup>  | 140.56(6)                      |
| O1              | Dy1              | O4                             | 75.23(7)                                                | O4              | Dy1  | O6               | 139.80(7)                      |
| O1              | Dy1              | O5 <sup>1</sup>                | 108.93(7)                                               | O4              | Dy1  | O7               | 130.24(7)                      |
| O1              | Dy1              | O6                             | 70.65(7)                                                | O4              | Dy1  | N1 <sup>1</sup>  | 64.48(7)                       |
| O1              | Dy1              | O7                             | 138.86(7)                                               | O4              | Dy1  | N3 <sup>1</sup>  | 76.03(7)                       |
| O1              | Dy1              | N1 <sup>1</sup>                | 123.66(7)                                               | O5 <sup>1</sup> | Dy1  | Dy1 <sup>1</sup> | 71.05(5)                       |
| O1              | Dy1              | N3 <sup>1</sup>                | 72.39(7)                                                | O5 <sup>1</sup> | Dy1  | O3               | 71.47(7)                       |
| O7              | Dy1              | Dy1 <sup>1</sup>               | 112.69(5)                                               | O5 <sup>1</sup> | Dy1  | O3 <sup>1</sup>  | 78.66(6)                       |
| O7              | Dy1              | O6                             | 71.19(7)                                                | O5 <sup>1</sup> | Dy1  | O6               | 72.40(7)                       |
| O7              | Dy1              | N1 <sup>1</sup>                | 65.83(7)                                                | O5 <sup>1</sup> | Dy1  | O7               | 72.97(7)                       |
| O7              | Dy1              | N3 <sup>1</sup>                | 82.85(7)                                                | O5 <sup>1</sup> | Dy1  | N1 <sup>1</sup>  | 127.30(7)                      |
| N1 <sup>1</sup> | Dy1              | Dy1 <sup>1</sup>               | 95.75(5)                                                | O5 <sup>1</sup> | Dy1  | N3 <sup>1</sup>  | 143.33(7)                      |
| N3 <sup>1</sup> | Dy1              | Dy1 <sup>1</sup>               | 145.20(5)                                               | O6              | Dy1  | Dy1 <sup>1</sup> | 139.71(5)                      |
| N3 <sup>1</sup> | Dy1              | N1 <sup>1</sup>                | 61.18(7)                                                | O6              | Dy1  | N1 <sup>1</sup>  | 119.95(7)                      |

<sup>1</sup>1-X,1-Y,1-Z; <sup>2</sup>1-X,-Y,1-Z

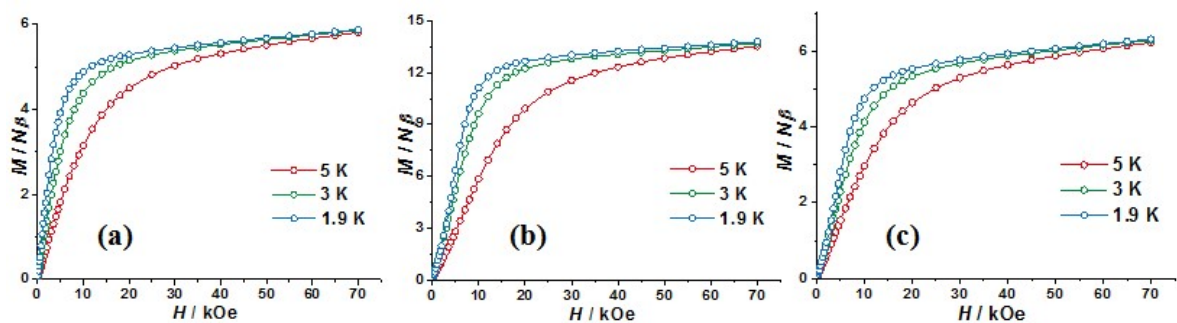

Fig. S6 The isothermal  $M$  vs.  $H$  plots for **1-3** (a-c), respectively.

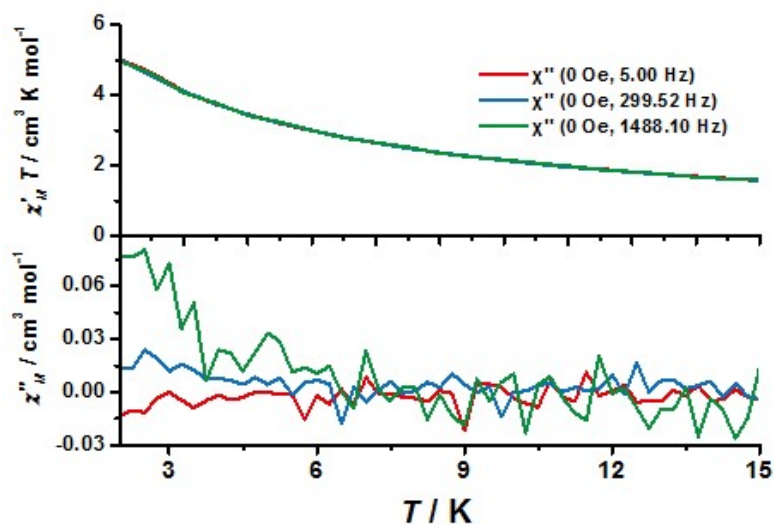

Fig. S7 Temperature dependence of the in-phase  $\chi M'$  product and out-of-phase  $\chi M''$  for **1** in a zero dc field with an ac frequency of 3.0 Oe.

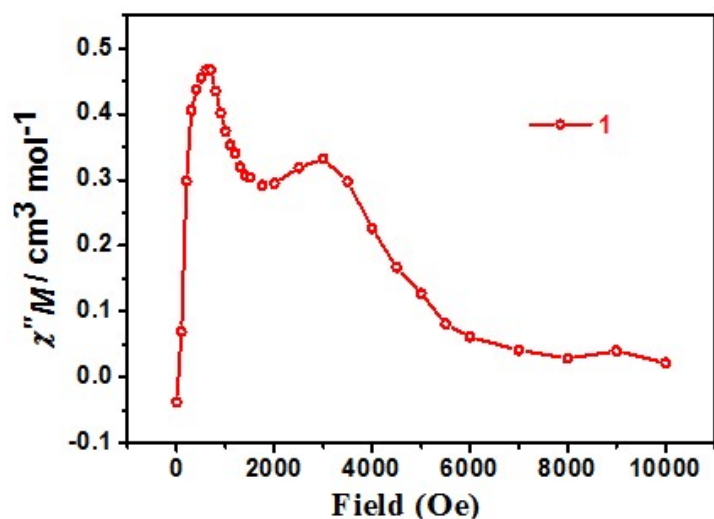

Fig. S8 Ac susceptibilities of **1** were measured at 1.9 K under different fields to find an optimum dc field for suppressing the QTM.

**Table S6** Relaxation fitting parameters from Least-Squares Fitting of  $\chi(\omega)$  data for **1** at 600 Oe dc field.

| $T/K$ | $\tau$     | $\tau$         | $\alpha$ | $\alpha$       | $\chi_0$ | $\chi_0$       | $\chi_\infty$ | $\chi_\infty$  |
|-------|------------|----------------|----------|----------------|----------|----------------|---------------|----------------|
|       | Value      | Standard Error | Value    | Standard Error | Value    | Standard Error | Value         | Standard Error |
| 2     | 0.00336    | 7.30368E-5     | 0.27104  | 0.00923        | 5.30749  | 0.02575        | 1.02005       | 0.02869        |
| 2.5   | 0.0013     | 2.23455E-5     | 0.21796  | 0.00773        | 4.42126  | 0.01341        | 0.8828        | 0.02434        |
| 3     | 5.54124E-4 | 9.96266E-6     | 0.19264  | 0.00766        | 3.79593  | 0.0088         | 0.7912        | 0.02611        |
| 3.5   | 2.66291E-4 | 3.94232E-6     | 0.16664  | 0.00554        | 3.30826  | 0.00414        | 0.76952       | 0.02076        |
| 4     | 1.27819E-4 | 1.58288E-6     | 0.16514  | 0.00331        | 2.93126  | 0.00154        | 0.69645       | 0.01592        |
| 4.5   | 5.28665E-5 | 2.24833E-6     | 0.21147  | 0.00608        | 2.63475  | 0.00164        | 0.49396       | 0.05009        |
| 5     | 0.00336    | 3.35116E-6     | 0.26868  | 0.00938        | 2.39407  | 0.00124        | 0.51274       | 0.14594        |

**Table S7** Relaxation fitting parameters from Least-Squares Fitting of  $\chi(\omega)$  data for **2** at 0 Oe dc field.

| $T/K$ | $\tau$     | $\tau$         | $\alpha$ | $\alpha$       | $\chi_0$ | $\chi_0$       | $\chi_\infty$ | $\chi_\infty$  |
|-------|------------|----------------|----------|----------------|----------|----------------|---------------|----------------|
|       | Value      | Standard Error | Value    | Standard Error | Value    | Standard Error | Value         | Standard Error |
| 9     | 4.89537E-5 | 2.84144E-6     | 0.11883  | 0.00927        | 2.96581  | 0.00112        | 1.85205       | 0.04212        |
| 8     | 1.38889E-4 | 4.99503E-6     | 0.16349  | 0.01011        | 3.24829  | 0.00321        | 1.78567       | 0.03027        |
| 7     | 2.481E-4   | 1.83229E-5     | 0.28244  | 0.01914        | 3.59171  | 0.01262        | 1.35758       | 0.07417        |
| 6     | 3.01702E-4 | 2.04796E-5     | 0.36673  | 0.01451        | 4.00342  | 0.01884        | 0.20649       | 0.09857        |
| 5.5   | 5.71723E-4 | 1.39014E-5     | 0.31729  | 0.00745        | 4.20031  | 0.01234        | 0.14471       | 0.03963        |
| 5     | 0.00114    | 1.3009E-5      | 0.27391  | 0.00448        | 4.4083   | 0.00929        | 0.16692       | 0.01875        |
| 4.5   | 0.00223    | 2.10839E-5     | 0.25373  | 0.0041         | 4.64605  | 0.01049        | 0.20611       | 0.01448        |
| 4     | 0.00398    | 4.93017E-5     | 0.25969  | 0.00537        | 4.9078   | 0.01688        | 0.23615       | 0.0172         |
| 3.5   | 0.00601    | 8.78741E-5     | 0.28817  | 0.00599        | 5.17077  | 0.02294        | 0.21666       | 0.01877        |
| 3     | 0.00765    | 1.0765E-4      | 0.30809  | 0.00548        | 5.34603  | 0.02388        | 0.2024        | 0.01704        |
| 2.5   | 0.00885    | 1.24442E-4     | 0.31718  | 0.00532        | 5.35255  | 0.02448        | 0.19667       | 0.01606        |
| 2     | 0.01006    | 1.46495E-4     | 0.32653  | 0.00533        | 5.05001  | 0.02431        | 0.19316       | 0.01478        |

**Table S8** Relaxation fitting parameters from Least-Squares Fitting of  $\chi(\omega)$  data for **3** at 0 Oe dc field.

| $T/K$ | $\tau$     | $\tau$         | $\alpha$ | $\alpha$       | $\chi_0$ | $\chi_0$       | $\chi_\infty$ | $\chi_\infty$  |
|-------|------------|----------------|----------|----------------|----------|----------------|---------------|----------------|
|       | Value      | Standard Error | Value    | Standard Error | Value    | Standard Error | Value         | Standard Error |
| 2     | 3.65489E-4 | 9.3868E-6      | 0.20189  | 0.00966        | 2.60338  | 0.00663        | 0.54128       | 0.02669        |
| 2.3   | 3.37087E-4 | 8.8007E-6      | 0.19943  | 0.00965        | 2.6456   | 0.00645        | 0.575         | 0.02758        |
| 2.6   | 2.79968E-4 | 8.13193E-6     | 0.20345  | 0.00997        | 2.63286  | 0.00611        | 0.59754       | 0.03044        |
| 2.9   | 2.14292E-4 | 6.32298E-6     | 0.20433  | 0.00909        | 2.58403  | 0.00475        | 0.64451       | 0.02994        |
| 3.2   | 1.57409E-4 | 6.13492E-6     | 0.21512  | 0.01012        | 2.51841  | 0.00431        | 0.70017       | 0.03682        |
| 3.5   | 1.29624E-4 | 6.20224E-6     | 0.22258  | 0.01105        | 2.44343  | 0.00384        | 0.81732       | 0.04015        |
| 4     | 1.19673E-4 | 4.34051E-6     | 0.21043  | 0.0091         | 2.31485  | 0.00306        | 1.05256       | 0.02458        |
| 4.5   | 9.45254E-5 | 2.7406E-6      | 0.18555  | 0.0067         | 2.17963  | 0.00153        | 1.1791        | 0.01634        |
| 5     | 3.80414E-5 | 3.71468E-6     | 0.21272  | 0.01138        | 2.0564   | 0.00116        | 1.04542       | 0.05554        |
| 6     | 2.46888E-5 | 8.70605E-6     | 0.21779  | 0.0261         | 1.83649  | 5.64746E-4     | 1.55209       | 0.05959        |

## Computational details

Mononuclear complex **1** has one type of molecular structure, and binuclear complexes **2** and **3** with central symmetrical structure also have only one type of magnetic center Dy<sup>III</sup> ion indicated as **2\_Dy1** and **3\_Dy1**. Complete-active-space self-consistent field (CASSCF) calculations on complex **1** and individual Dy<sup>III</sup> fragments of **2** and **3** (see Figure S9 for the calculated complete structures of **1–3**) on the basis of single-crystal X-ray determined geometries have been carried out with MOLCAS 8.4<sup>S1</sup> program package. Each individual Dy<sup>III</sup> fragment in **2** and **3** was calculated keeping the experimentally determined structure of the corresponding compound while replacing the neighboring Dy<sup>III</sup> ion by diamagnetic Lu<sup>III</sup>.

The basis sets for all atoms are atomic natural orbitals from the MOLCAS ANO-RCC library: ANO-RCC-VTZP for Dy<sup>III</sup>; VTZ for close N and O; VDZ for distant atoms. The calculations employed the second order Douglas-Kroll-Hess Hamiltonian, where scalar relativistic contractions were taken into account in the basis set and the spin-orbit couplings were handled separately in the restricted active space state interaction (RASSI-SO) procedure.<sup>S2-S3</sup> For individual Dy<sup>III</sup> fragment, active electrons in 7 active orbitals include all f electrons (CAS (9 in 7)) in the CASSCF calculation. To exclude all the doubts, we calculated all the roots in the active space. We have mixed the maximum number of spin-free state which was possible with our hardware (all from 21

sextets, 128 from 224 quadruplets, 130 from 490 doublets). SINGLE\_ANISO<sup>S4-S6</sup> program was used to obtain the energy levels,  $g$  tensors,  $m_j$  values, magnetic axes, *et al.* based on the above CASSCF/RASSI-SO calculations.

To fit the exchange interactions between Dy<sup>III</sup> ions in complexes **2** and **3**, we took two steps to obtain them. Firstly, we calculated individual Dy<sup>III</sup> fragments using CASSCF/RASSI-SO to obtain the corresponding magnetic properties. Then, the exchange interaction between the magnetic centers was considered within the Lines model,<sup>S7</sup> while the account of the dipole-dipole magnetic coupling is treated exactly. The Lines model is effective and has been successfully used widely in the research field of d and f-elements single-molecule magnets.<sup>S8-S9</sup>

The Ising exchange Hamiltonian for **2** and **3** is:  $H_{\text{exch}} = -J\mathbf{S}_{\text{Dy1}}\mathbf{S}_{\text{Dy2}}$

The  $J = 25 \cos \varphi J$ , where  $\varphi$  is the angle between the anisotropy axes on two Dy<sup>III</sup> sites, and  $J$  is the Lines exchange coupling parameter.  $\mathbf{S}_{\text{Dy}} = 1/2$  is the ground pseudospin on the Dy<sup>III</sup> site.  $J_{\text{total}}$  is the parameter of the total magnetic interaction ( $J_{\text{total}} = J_{\text{dip}} + J_{\text{exch}}$ ) between magnetic center ions. The dipolar magnetic coupling can be calculated exactly, while the exchange coupling constants were fitted through comparison of the computed and measured magnetic susceptibilities using POLY\_ANISO program.<sup>S4-S6</sup>

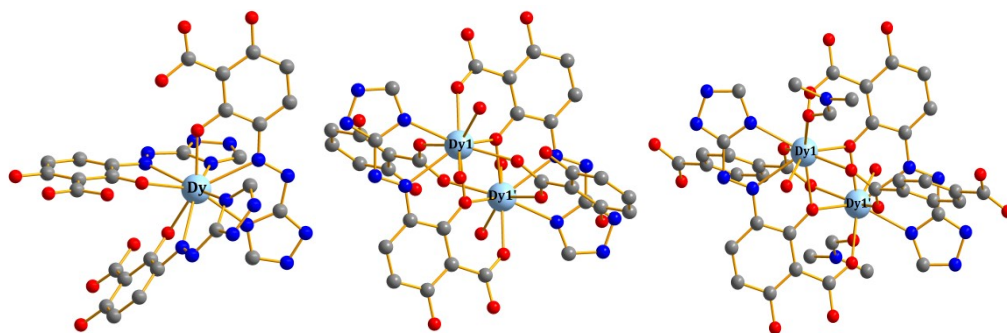

**Figure S9.** Calculated complete structures of **1–3**; H atoms are omitted for clarify.

**Table S9.** Calculated energy levels ( $\text{cm}^{-1}$ ),  $\mathbf{g}$  ( $g_x, g_y, g_z$ ) tensors and predominant  $m_J$  values of the lowest eight Kramers doublets (KDs) of complex **1** and individual  $\text{Dy}^{\text{III}}$  fragments for complexes **2** and **3** using CASSCF/RASSI-SO with MOLCAS 8.4.

| KDs | <b>1</b>           |                          |            | <b>2_Dy1</b>       |                          |            | <b>3_Dy1</b>       |                          |            |
|-----|--------------------|--------------------------|------------|--------------------|--------------------------|------------|--------------------|--------------------------|------------|
|     | $E/\text{cm}^{-1}$ | $\mathbf{g}$             | $m_J$      | $E/\text{cm}^{-1}$ | $\mathbf{g}$             | $m_J$      | $E/\text{cm}^{-1}$ | $\mathbf{g}$             | $m_J$      |
| 1   | 0.0                | 0.003<br>0.003<br>19.740 | $\pm 15/2$ | 0.0                | 0.030<br>0.068<br>19.525 | $\pm 15/2$ | 0.0                | 0.079<br>0.206<br>19.118 | $\pm 15/2$ |
| 2   | 110.1              | 0.905<br>1.957<br>13.450 | $\pm 13/2$ | 48.8               | 0.177<br>0.225<br>16.714 | $\pm 13/2$ | 29.3               | 1.848<br>2.823<br>15.955 | $\pm 11/2$ |
| 3   | 153.4              | 0.730<br>3.180<br>12.073 | $\pm 5/2$  | 133.5              | 1.625<br>2.229<br>11.765 | $\pm 11/2$ | 54.7               | 3.703<br>5.098<br>9.118  | $\pm 13/2$ |
| 4   | 245.6              | 0.065<br>4.764<br>9.729  | $\pm 11/2$ | 171.5              | 2.113<br>4.747<br>11.167 | $\pm 5/2$  | 90.4               | 0.895<br>4.104<br>10.091 | $\pm 9/2$  |
| 5   | 299.2              | 4.005<br>4.819<br>11.503 | $\pm 9/2$  | 213.1              | 3.109<br>4.711<br>11.389 | $\pm 7/2$  | 147.6              | 1.248<br>2.141<br>13.250 | $\pm 7/2$  |
| 6   | 372.8              | 0.196<br>1.485<br>16.669 | $\pm 7/2$  | 296.4              | 0.719<br>2.492<br>15.309 | $\pm 3/2$  | 214.0              | 0.371<br>0.627<br>16.808 | $\pm 5/2$  |
| 7   | 413.4              | 1.223<br>2.092<br>15.275 | $\pm 3/2$  | 335.4              | 1.148<br>1.643<br>17.625 | $\pm 1/2$  | 324.0              | 0.075<br>0.127<br>16.606 | $\pm 3/2$  |
| 8   | 506.3              | 0.316<br>0.435<br>17.922 | $\pm 1/2$  | 399.0              | 0.125<br>0.362<br>19.038 | $\pm 9/2$  | 364.2              | 0.053<br>0.202<br>17.862 | $\pm 1/2$  |



**Table S10.** Wave functions with definite projection of the total moment  $|m_J\rangle$  for the lowest eight KDs of complex **1** and individual Dy<sup>III</sup> fragments for complexes **2** and **3** using CASSCF/RASSI-SO with MOLCAS 8.4.

|              | $E/\text{cm}^{-1}$ | wave functions                                                                                                                                          |
|--------------|--------------------|---------------------------------------------------------------------------------------------------------------------------------------------------------|
| <b>1</b>     | 0.0                | 95.00% $ \pm 15/2\rangle$                                                                                                                               |
|              | 110.1              | 65.60% $ \pm 13/2\rangle$ +8.5% $ \pm 1/2\rangle$ +7.3% $ \pm 3/2\rangle$ +5.9% $ \pm 11/2\rangle$ +5.9% $ \pm 7/2\rangle$                              |
|              | 153.4              | 33.1% $ \pm 1/2\rangle$ +23.1% $ \pm 3/2\rangle$ +13.2% $ \pm 5/2\rangle$ +12.6% $ \pm 13/2\rangle$ +9.9% $ \pm 11/2\rangle$                            |
|              | 245.6              | 28.6% $ \pm 11/2\rangle$ +18.7% $ \pm 9/2\rangle$ +14.1% $ \pm 13/2\rangle$ +12.6% $ \pm 3/2\rangle$ +11.6% $ \pm 7/2\rangle$<br>>                      |
|              | 299.2              | 33.5% $ \pm 11/2\rangle$ +22.7% $ \pm 5/2\rangle$ +19.2% $ \pm 7/2\rangle$ +13.9% $ \pm 9/2\rangle$ +4.0% $ \pm 3/2\rangle$                             |
|              | 372.8              | 30.0% $ \pm 9/2\rangle$ +24.6% $ \pm 7/2\rangle$ +12.7% $ \pm 11/2\rangle$ +12.3% $ \pm 3/2\rangle$ +9.9% $ \pm 5/2\rangle$                             |
|              | 413.4              | 28.7% $ \pm 1/2\rangle$ +20.1% $ \pm 9/2\rangle$ +18.7% $ \pm 3/2\rangle$ +13.6% $ \pm 7/2\rangle$ +13.2% $ \pm 5/2\rangle$                             |
|              | 506.3              | 27.0% $ \pm 5/2\rangle$ +22.1% $ \pm 7/2\rangle$ +21.8% $ \pm 3/2\rangle$ +15.1% $ \pm 1/2\rangle$ +9.7% $ \pm 9/2\rangle$                              |
| <b>2_Dy1</b> | 0.0                | 96.2% $ \pm 15/2\rangle$                                                                                                                                |
|              | 48.8               | 93.4% $ \pm 13/2\rangle$                                                                                                                                |
|              | 133.5              | 71.2% $ \pm 11/2\rangle$ +10.1% $ \pm 3/2\rangle$ +8.3% $ \pm 1/2\rangle$ +4.5% $ \pm 9/2\rangle$                                                       |
|              | 171.5              | 26.3% $ \pm 9/2\rangle$ +22.9% $ \pm 1/2\rangle$ +18.7% $ \pm 3/2\rangle$ +12.3% $ \pm 5/2\rangle$ +11.9% $ \pm 7/2\rangle$                             |
|              | 213.1              | 29.4% $ \pm 7/2\rangle$ +28.3% $ \pm 5/2\rangle$ +19.3% $ \pm 3/2\rangle$ +6.9% $ \pm 1/2\rangle$ +6.8% $ \pm 9/2\rangle$                               |
|              | 296.4              | 22.0% $ \pm 1/2\rangle$ +21.5% $ \pm 5/2\rangle$ +19.3% $ \pm 3/2\rangle$ +19.0% $ \pm 9/2\rangle$ +14.6% $ \pm 7/2\rangle$                             |
|              | 335.4              | 37.1% $ \pm 1/2\rangle$ +33.9% $ \pm 3/2\rangle$ +12.3% $ \pm 7/2\rangle$ +10.9% $ \pm 5/2\rangle$                                                      |
|              | 399.0              | 30.3% $ \pm 5/2\rangle$ +30.1% $ \pm 7/2\rangle$ +15.9% $ \pm 9/2\rangle$ +10.7% $ \pm 3/2\rangle$ +7.5% $ \pm 11/2\rangle$                             |
| <b>3_Dy1</b> | 0.0                | 91.0% $ \pm 15/2\rangle$                                                                                                                                |
|              | 29.3               | 25.4% $ \pm 9/2\rangle$ +19.8% $ \pm 13/2\rangle$ +15.6% $ \pm 7/2\rangle$ +14.3% $ \pm 11/2\rangle$ +11.3% $ \pm 5/2\rangle$<br>>+7% $ \pm 5/2\rangle$ |
|              | 54.7               | 50.8% $ \pm 13/2\rangle$ +21.0% $ \pm 11/2\rangle$ +14.9% $ \pm 7/2\rangle$ +3.9% $ \pm 9/2\rangle$                                                     |
|              | 90.4               | 34.4% $ \pm 11/2\rangle$ +20.6% $ \pm 13/2\rangle$ +20.3% $ \pm 9/2\rangle$ +11.3% $ \pm 5/2\rangle$ +6.9% $ \pm 3/2\rangle$                            |
|              | 147.6              | 33.7% $ \pm 9/2\rangle$ +22.2% $ \pm 7/2\rangle$ +19.5% $ \pm 11/2\rangle$ +7.0% $ \pm 1/2\rangle$ +6.4% $ \pm 3/2\rangle$                              |
|              | 214.0              | 32.8% $ \pm 7/2\rangle$ +31.1% $ \pm 5/2\rangle$ +12.0% $ \pm 3/2\rangle$ +11.2% $ \pm 9/2\rangle$ +8.3% $ \pm 1/2\rangle$                              |
|              | 324.0              | 38.7% $ \pm 3/2\rangle$ +35.2% $ \pm 5/2\rangle$ +12.2% $ \pm 1/2\rangle$ +10.7% $ \pm 7/2\rangle$                                                      |
|              | 364.2              | 61.4% $ \pm 1/2\rangle$ +26.4% $ \pm 3/2\rangle$ +4.1% $ \pm 5/2\rangle$                                                                                |

**Table S11.** Exchange energies  $E$  ( $\text{cm}^{-1}$ ), the energy difference between each exchange doublets  $\Delta_t$  ( $\text{cm}^{-1}$ ) and the main values of the  $g_z$  for the lowest two exchange doublets of **2** and **3**.

|   | <b>2</b>       |                        |        | <b>3</b>       |                        |        |
|---|----------------|------------------------|--------|----------------|------------------------|--------|
|   | $E$            | $\Delta_t$             | $g_z$  | $E$            | $\Delta_t$             | $g_z$  |
| 1 | 0.000000000000 | $1.955 \times 10^{-5}$ | 0.000  | 0.000000000000 | $2.204 \times 10^{-4}$ | 0.000  |
|   | 0.000019550866 |                        |        | 0.000220394298 |                        |        |
| 2 | 2.753181132228 | $3.437 \times 10^{-5}$ | 39.051 | 1.987569597334 | $3.338 \times 10^{-4}$ | 38.196 |
|   | 2.753215506500 |                        |        | 1.987903364877 |                        |        |

## References:

- S1 Aquilante, F.; Autschbach, J.; Carlson, R. K.; Chibotaru, L. F.; Delcey, M. G.; De Vico, L.; Galván, I. F.; Ferré, N.; Frutos, L. M.; Gagliardi, L.; Garavelli, M.; Giussani, A.; Hoyer, C. E.; Li Manni, G.; Lischka, H.; Ma, D.; Malmqvist, P. Å.; Müller, T.; Nenov, A.; Olivucci, M.; Pedersen, T. B.; Peng, D.; Plasser, F.; Pritchard, B.; Reiher, M.; Rivalta, I.; Schapiro, I.; Segarra-Martí, J.; Stenrup, M.; Truhlar, D. G.; Ungur, L.; Valentini, A.; Vancoillie, S.; Veryazov, V.; Vysotskiy, V. P.; Weingart, O.; Zapata, F.; Lindh, R. *J. Comput. Chem.* **2016**, *37*, 506–541.
- S2 Malmqvist, P. Å.; Roos, B. O.; Schimmelpfennig, B. *Chem. Phys. Lett.*, **2002**, *357*, 230–240.
- S3 Heß, B. A.; Marian, C. M.; Wahlgren, U.; Gropen, O. *Chem. Phys. Lett.*, **1996**, *251*, 365–371.
- S4 Chibotaru, L. F.; Ungur, L.; Soncini, A. *Angew. Chem., Int. Ed.* **2008**, *47*, 4126–4129.
- S5 Ungur, L.; Van den Heuvel, W.; Chibotaru, L. F. *New J. Chem.* **2009**, *33*, 1224–1230.
- S6 Chibotaru, L. F.; Ungur, L.; Aronica, C.; Elmoll, H.; Pilet, G.; Luneau, D. *J. Am. Chem. Soc.* **2008**, *130*, 12445–12455.
- S7 Lines, M. E. *J. Chem. Phys.* **1971**, *55*, 2977–2984.
- S8 Mondal, K. C.; Sundt, A.; Lan, Y. H.; Kostakis, G. E.; Waldmann, O.; Ungur, L.; Chibotaru, L. F.; Anson, C. E.; Powell, A. K. *Angew. Chem., Int. Ed.* **2012**, *51*, 7550–7554.
- S9 Langley, S. K.; Wielechowski, D. P.; Vieru, V.; Chilton, N. F.; Moubaraki, B.; Abrahams, B. F.; Chibotaru, L. F.; Murray, K. S. *Angew. Chem., Int. Ed.* **2013**, *52*, 12014–12019.
